# Supplementary material
Source: PubMed Central journal article supplement (PMC7903881)
Supplement: NIHMS1669779-supplement-Supplementary_Material.pdf [file NIHMS1669779-supplement-Supplementary_Material.pdf]

## **Supporting Information**

### **DNA sequencing**

All genomic studies were performed on DNA extracted from blood, saliva, or sperm samples. DNA capture and sequencing of exomes was carried out as previously described by Hansen, et al at either the Baylor Genetics (BG) laboratories or at the Baylor College of Medicine Human Genome Sequencing Center (HGSC), through the Baylor-Hopkins Center for Mendelian Genomics initiative. Briefly, pre-capture libraries were prepared according to a modified manufacturer's protocol, pooled into either 4-plex library pools and hybridized in solution to the HGSC-designed Core capture reagent (52Mb, NimbleGen), or 6-plex library pools using the custom VCRome 2.1 capture reagent (42Mb, NimbleGen) according to the manufacturer's protocol with minor revisions. The sequencing run was performed in paired-end mode using either the Illumina HiSeq 2000 or 2500 platforms. In parallel to the exome workflow an Illumina Infinium Human Exome v1-2 array was generated for a final quality assessment, including orthogonal confirmation of sample identity and purity using the Error Rate In Sequencing (ERIS) pipeline developed at the BCM-HGSC. Using an "e-GenoTyping" approach, ERIS screens all sequence reads for exact matches to probe sequences defined by the variant and position of interest. A successfully sequenced sample must meet quality control metrics of ERIS SNP array concordance (>90%) and ERIS average contamination rate (<5%).

### **NGS analysis**

Fastq files were aligned to hg19. Variants were called with Atlas2 (v1.4.3) and annotated with ANNoVAR. High quality homozygous variants, compound heterozygous variants, and ultra-rare (MAF < 1/1,000) or novel variants shared between index family affected siblings and absent from unaffected family members were prioritized. For the index family, IBD was estimated

using PLINK (Purcell et al., 2007). Familial relationships were reconstructed and confirmed by PRIMUS (Staples, Nickerson, & Below, 2013).

### **Droplet Digital PCR (ddPCR)**

We utilized ddPCR on the Bio-Rad QX200 system (Hercules, CA) to assess possible mosaicism for the variant in the parental samples as well as germline mosaicism in a paternal sperm sample. A TaqMan probe with a HEX fluorescent reporter and accompanying forward and reverse primers were designed to selectively amplify in presence of the variant and not amplify the wildtype position and ordered through the Sigma-Aldrich custom oligo system (St. Louis, MO). Droplets were generated containing approximately 40 ng of genomic DNA and subsequently run on a standard thermocycler to endpoint (95°C for 10 min, 40 cycles of 95°C for 30 sec and 62°C for 60 sec, 95°C for 10 min). The presence or absence of a HEX fluorescent signal was quantified for each droplet with the QuantaSoft software suite.

## Supplementary Figures and Tables

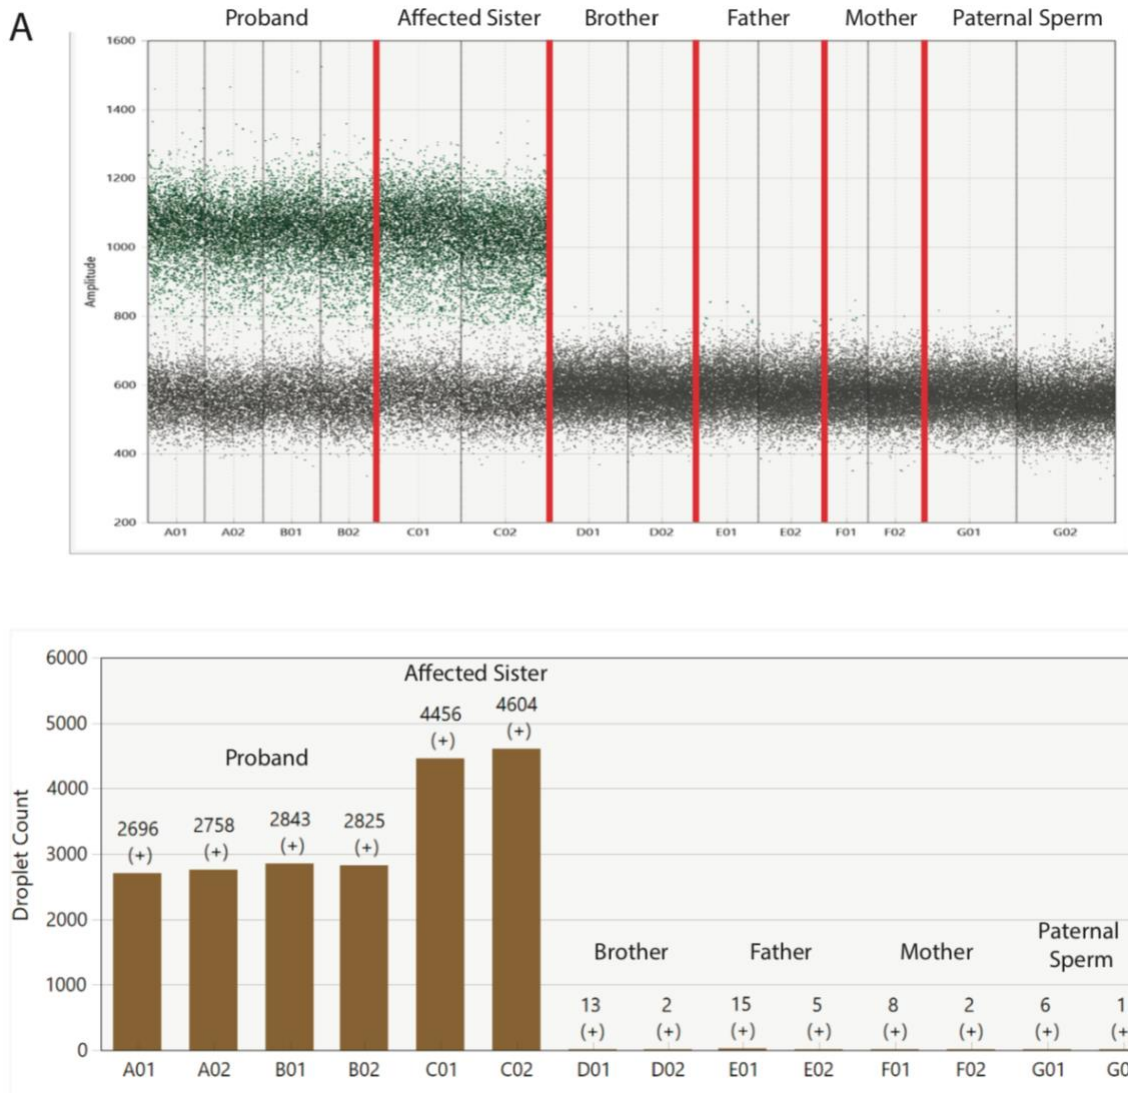

**Supp. Figure S1 – ddPCR reveals no low-level mosaicism in parental blood samples or paternal sperm.** A) Separation of positive and negative droplets for the mutation-specific HEX labeled fluorescent TaqMan probe. Green droplets represent positive amplification of the target variant and grey droplets represent no amplification across all sample replicates. B) Quantification of droplets positive for the target variant across all samples tested.

| Index # | Variant | Origin       | CNS involvement | Type of CNS involvement                                                                                | Spasticity | Motor Domain | Missense | De novo |
|---------|---------|--------------|-----------------|--------------------------------------------------------------------------------------------------------|------------|--------------|----------|---------|
| 1       | R13H    | Baylor       | Yes             | Delayed motor milestones, specific learning disabilities, ADHD, cognitive alterations                  | Yes        | Yes          | Yes      | Yes     |
| 2       | R13L    | Baylor       | Yes             | ID, cognitive behavioral alterations                                                                   | No         | Yes          | Yes      | Yes     |
| 3       | T99M    | Baylor       | Yes             | Global developmental delay, brain abnormalities, seizures, cerebral palsy, optic atrophy, ID           | No         | Yes          | Yes      | Yes     |
| 4       | G102S   | Baylor       | Yes             | Global developmental delay, insensitivity to heat and pain                                             | No         | Yes          | Yes      | Yes     |
| 5       | R216C   | Baylor       | Yes             | Delayed motor milestones                                                                               | No         | Yes          | Yes      | Yes     |
| 6       | R316Q   | Baylor       | Yes             | Global developmental delay                                                                             | Yes        | Yes          | Yes      | Yes     |
| 7       | N272del | Peru proband | Yes             | ID, cerebellar atrophy                                                                                 | Yes        | Yes          | No       | Yes     |
| 8       | N272del | Peru sister  | Yes             | ID, cerebellar atrophy, pale optic disks                                                               | No         | Yes          | No       | Yes     |
| 9       | S58L    | Lee et al.   | Yes             | Mild ID, language delay, cerebellar atrophy, neuropathy                                                | Yes        | Yes          | Yes      | Yes     |
| 10      | T99M    | Lee et al.   | Yes             | ID, walks independently, no optic nerve atrophy                                                        | Yes        | Yes          | Yes      | Yes     |
| 11      | T99M    | Lee et al.   | Yes             | Severe ID, non-verbal, optic nerve atrophy, microcephaly, epilepsy                                     | Yes        | Yes          | Yes      | Yes     |
| 12      | G102D   | Lee et al.   | Yes             | Mild ID, abnormal EEG, neuropathy, cerebellar atrophy                                                  | Yes        | Yes          | Yes      | Yes     |
| 13      | V144F   | Lee et al.   | Yes             | Moderate ID, mild optic atrophy,                                                                       | Yes        | Yes          | Yes      | Yes     |
| 14      | V144F   | Lee et al.   | Yes             | Moderate ID, mild optic atrophy,                                                                       | Yes        | Yes          | Yes      | Yes     |
| 15      | R167C   | Lee et al.   | Yes             | Mild ID, neuropathy                                                                                    | Yes        | Yes          | Yes      | Yes     |
| 16      | A202P   | Lee et al.   | Yes             | ID, non-ambulatory, non-verbal, optic nerve atrophy, microcephaly, cerebral atrophy                    | Yes        | Yes          | Yes      | Yes     |
| 17      | S215R   | Lee et al.   | Yes             | ID, non-ambulatory, optic atrophy, microcephaly, epilepsy, neuropathy, cerebellar and cerebral atrophy | Yes        | Yes          | Yes      | Yes     |
| 18      | R216P   | Lee et al.   | Yes             | ID, abnormal EEG, mild optic nerve atrophy, cerebellar atrophy                                         | Yes        | Yes          | Yes      | Yes     |
| 19      | L249Q   | Lee et al.   | Yes             | ID, Optic nerve atrophy,                                                                               | Yes        | Yes          | Yes      | Yes     |
| 20      | E253K   | Lee et al.   | Yes             | Severe ID, non-ambulatory, non-verbal, optic nerve atrophy, seizures, cerebellar atrophy               | No         | Yes          | Yes      | Yes     |
| 21      | E253K   | Lee et al.   | Yes             | Severe ID, non-ambulatory, non-verbal, optic atrophy, seizures NA, cerebellar atrophy                  | No         | Yes          | Yes      | Yes     |

|    |       |                              |     |                                                                                                                                                                        |     |     |     |     |
|----|-------|------------------------------|-----|------------------------------------------------------------------------------------------------------------------------------------------------------------------------|-----|-----|-----|-----|
| 22 | R316W | Lee et al.                   | Yes | Mild ID, Optic atrophy, cerebellar atrophy                                                                                                                             | Yes | Yes | Yes | Yes |
| 23 | E148D | Ohba et al.                  | Yes | Nystagmus, mild ID, cerebellar atrophy                                                                                                                                 | No  | Yes | Yes | Yes |
| 24 | R254W | Ohba et al.                  | Yes | Mild ID, cerebellar atrophy, optic atrophy                                                                                                                             | Yes | Yes | Yes | Yes |
| 25 | R254Q | Ohba et al.                  | Yes | Mild ID, cerebellar atrophy                                                                                                                                            | Yes | Yes | Yes | Yes |
| 26 | R307Q | Ohba et al.                  | Yes | Severe ID, progressive cerebellar atrophy, optic atrophy, nystagmus                                                                                                    | Yes | Yes | Yes | Yes |
| 27 | R316W | Ohba et al.                  | Yes | Severe ID, progressive cerebellar atrophy, optic atrophy, nystagmus                                                                                                    | Yes | Yes | Yes | Yes |
| 28 | T99M  | Hamdan et al.                | Yes | Severe ID, cerebellar atrophy                                                                                                                                          | Yes | Yes | Yes | Yes |
| 29 | T99M  | Esmaelii Nieh et al.         | Yes | Severe developmental delay, cortical visual impairment, cerebellar atrophy                                                                                             | Yes | Yes | Yes | Yes |
| 30 | T99M  | Esmaelii Nieh et al.         | Yes | Severe developmental delay, seizures, cerebellar atrophy                                                                                                               | Yes | Yes | Yes | Yes |
| 31 | E253K | Esmaelii Nieh et al.         | Yes | Severe developmental delay, cortical visual impairment, microcephaly                                                                                                   | Yes | Yes | Yes | Yes |
| 32 | R316W | Esmaelii Nieh et al.         | Yes | ID, ASD, microcephaly                                                                                                                                                  | Yes | Yes | Yes | Yes |
| 33 | R216C | Esmaelii Nieh et al.         | Yes | ID                                                                                                                                                                     | Yes | Yes | Yes | Yes |
| 34 | R216H | Esmaelii Nieh et al.         | Yes | Developmental delay, cerebellar atrophy                                                                                                                                | Yes | Yes | Yes | Yes |
| 35 | P305L | Spagnoli et al.              | Yes | Mild ID, microcephaly, bilateral optic atrophy, cerebellar atrophy                                                                                                     | Yes | Yes | Yes | Yes |
| 36 | R13C  | Kurihara et al.              | Yes | Tonic seizures, ASD, ADHD, intellectual disability, cerebellar and corpus callosum atrophy, left optic atrophy.                                                        | Yes | Yes | Yes | Yes |
| 37 | T99M  | Okamoto et al.               | Yes | Intellectual disability, progressive cerebellar atrophy, corpus callosum hypoplasia, nystagmus, optic atrophy, tonic clonic seizures, microcephaly, neurogenic bladder | Yes | Yes | Yes | Yes |
| 38 | R13H  | Tomaselli et al.             | Yes | Axonal neuropathy, autism, delayed motor milestones                                                                                                                    | Yes | Yes | Yes | Yes |
| 39 | R307Q | Hotchkiss et al. (patient 1) | Yes | ID, progressive cerebellar atrophy, optic nerve atrophy, seizures, peripheral neuropathy,                                                                              | Yes | Yes | Yes | Yes |
| 40 | G199R | Hotchkiss (patient 2)        | Yes | ID, cerebellar atrophy, optic nerve atrophy                                                                                                                            | Yes | Yes | Yes | Yes |
| 41 | G102S | Citterio et al. (P67809)     | Yes | Mild language and motor delay, IQ: 80                                                                                                                                  | Yes | Yes | Yes | No  |

|    |        |                                      |     |                                                                                                          |     |     |     |     |
|----|--------|--------------------------------------|-----|----------------------------------------------------------------------------------------------------------|-----|-----|-----|-----|
| 42 | S69L   | Citterio et al. P7814 V-6 (proband)  | Yes | Mild psychomotor retardation                                                                             | Yes | Yes | Yes | No  |
| 43 | S69L   | Citterio et al. P7814 IV-4 (mother)  | No  | NA                                                                                                       | No  | Yes | Yes | No  |
| 44 | S69L   | Citterio et al. (P7814 III-8)        | No  | NA                                                                                                       | Yes | Yes | Yes | No  |
| 45 | S69L   | Citterio et al. (P7814 III-6)        | No  | NA                                                                                                       | Yes | Yes | Yes | No  |
| 46 | R167C  | Citterio et al. (P116909)            | No  | NA                                                                                                       | Yes | Yes | Yes | Yes |
| 47 | I1127T | Citterio et al. (P22413)             | Yes | Normal IQ, subcortical and periventricular hyperintensities frontoparietal regions and pons              | Yes | No  | Yes | No  |
| 48 | T258M  | Cheon et al. Patient I.1 (mother)    | Yes | Mild ID, language delay, optic nerve atrophy, scoliosis polyneuropathy sensorimotor in lower extremities | Yes | Yes | Yes | No  |
| 49 | T258M  | Cheon et al. Patient II.1 (daughter) | Yes | Mild ID language delay, optic nerve hypoplasia, thinning of corpus callosum, microcephaly                | Yes | Yes | Yes | No  |
| 50 | T258M  | Cheon et al. Patient II.2 (daughter) | Yes | Moderate ID, language delay, pale optic disks, thinning of corpus callosum                               | Yes | Yes | Yes | No  |
| 51 | T258M  | Cheon et al. Patient II.3 (son)      | Yes | Mild ID language delay, pale optic disks, thinning of corpus callosum, epilepsy                          | Yes | Yes | Yes | No  |
| 52 | A85D   | Yoshikawa et al.                     | Yes | Cerebellar and mild cerebral atrophy, ID                                                                 | Yes | Yes | Yes | No  |
| 53 | M30T   | Pennings et al. (Patient 1)          | No  | NA                                                                                                       | Yes | Yes | Yes | No  |
| 54 | Y56C   | Pennings et al. (Patient 2)          | No  | NA                                                                                                       | Yes | Yes | Yes | Yes |
| 55 | S69L   | Pennings et al. (Patient 3)          | Yes | IQ: 80                                                                                                   | Yes | Yes | Yes | No  |
| 56 | Y74C   | Pennings et al. (Patient 4)          | No  | NA                                                                                                       | Yes | Yes | Yes | Yes |
| 57 | G78S   | Pennings et al. (Patient 5)          | No  | NA                                                                                                       | Yes | Yes | Yes | Yes |
| 58 | T106N  | Pennings et al. (Patient 6)          | No  | NA                                                                                                       | Yes | Yes | Yes | No  |
| 59 | R167H  | Pennings et al. (Patient 7)          | No  | NA                                                                                                       | Yes | Yes | Yes | No  |
| 60 | L173P  | Pennings et al. (Patient 8)          | Yes | IQ: 80                                                                                                   | Yes | Yes | Yes | Yes |
| 61 | S252R  | Pennings et al. (Patient 9)          | No  | NA                                                                                                       | Yes | Yes | Yes | No  |
| 62 | S252R  | Pennings et al. (Patient 10)         | No  | NA                                                                                                       | Yes | Yes | Yes | Yes |
| 63 | T258M  | Pennings et al. (Patient 11)         | No  | NA                                                                                                       | Yes | Yes | Yes | Yes |

|    |                                |                                 |     |                                                                                                                       |     |     |     |     |
|----|--------------------------------|---------------------------------|-----|-----------------------------------------------------------------------------------------------------------------------|-----|-----|-----|-----|
| 64 | T258M                          | Pennings et al.<br>(Patient 12) | Yes | Thin corpus callosum                                                                                                  | Yes | Yes | Yes | No  |
| 65 | T258M                          | Pennings et al.<br>(Patient 13) | Yes | Thin corpus callosum                                                                                                  | Yes | Yes | Yes | Yes |
| 66 | R350W                          | Pennings et al.<br>(Patient 14) | No  | NA                                                                                                                    | Yes | Yes | Yes | No  |
| 67 | A460G                          | Pennings et al.<br>(Patient 15) | No  | NA                                                                                                                    | Yes | No  | Yes | Yes |
| 68 | Q623*                          | Pennings et al.<br>(Patient 16) | No  | NA                                                                                                                    | Yes | No  | No  | Yes |
| 69 | R843C                          | Pennings et al.<br>(Patient 17) | No  | NA                                                                                                                    | Yes | No  | Yes | No  |
| 70 | R843C                          | Pennings et al.<br>(Patient 18) | No  | NA                                                                                                                    | Yes | No  | Yes | Yes |
| 71 | N859K                          | Pennings et al.<br>(Patient 19) | No  | NA                                                                                                                    | Yes | No  | Yes | Yes |
| 72 | Y1325*                         | Pennings et al.<br>(Patient 20) | No  | NA                                                                                                                    | Yes | No  | No  | No  |
| 73 | D1369fs                        | Pennings et al.<br>(Patient 21) | No  | NA                                                                                                                    | Yes | No  | No  | Yes |
| 74 | P1431fs                        | Pennings et al.<br>(Patient 22) | No  | NA                                                                                                                    | Yes | No  | No  | No  |
| 75 | Y1581fs                        | Pennings et al.<br>(Patient 23) | No  | NA                                                                                                                    | Yes | No  | No  | Yes |
| 76 | Contiguous<br>Gene<br>deletion | Pennings et al.<br>(Patient 24) | Yes | Moderate ID                                                                                                           | Yes | No  | No  | Yes |
| 77 | S69L                           | Ylikallio et al.<br>(proband)   | Yes | Attention deficit disorder                                                                                            | Yes | Yes | Yes | No  |
| 78 | S69L                           | Ylikallio et al.<br>(father)    | No  | NA                                                                                                                    | Yes | Yes | Yes | Yes |
| 79 | T99M                           | Langlois et al.                 | Yes | Optic atrophy, infantile spasms, developmental delay,<br>cerebellar atrophy                                           | No  | Yes | Yes | Yes |
| 80 | E253K                          | Samanta et al.                  | Yes | Seizure, optic nerve pallor, epileptic spasms,<br>developmental delay, progressive cerebellar and<br>cerebral atrophy | No  | Yes | Yes | Yes |
| 81 | G321D                          | Dobkowska et al.                | Yes | Cognitive decline                                                                                                     | Yes | Yes | Yes | No  |
| 82 | G102S                          | Lu et al.                       | Yes | Intellectual deficiency, Nystagmus and pes cavus<br>Cerebellar atrophy, axonal polyneuropathy                         | NA  | Yes | Yes | No  |
| 83 | S58L                           | Megahead et al.                 | Yes | ID, seizures, Wide-based<br>staggering gait cerebellar and cerebral cortex atrophy                                    | NA  | Yes | Yes | Yes |

|    |       |                                      |     |                                                                                                                                                                                    |     |     |     |     |
|----|-------|--------------------------------------|-----|------------------------------------------------------------------------------------------------------------------------------------------------------------------------------------|-----|-----|-----|-----|
| 84 | S215R | Raffa et al.                         | Yes | Developmental delay, hypoplastic-atrophic optic discs, epilepsy, spastic paraparesis                                                                                               | Yes | Yes | Yes | Yes |
| 85 | S69L  | Roda et al.                          | No  | NA                                                                                                                                                                                 | Yes | Yes | Yes | No  |
| 86 | R216H | Travaglini et al.                    | Yes | Developmental delay, progressive cortical cerebral and cerebellar atrophy with thin corpus callosum                                                                                | Yes | Yes | Yes | Yes |
| 87 | R216H | Urtiaga et al.                       | Yes | Developmental delay, neurogenic bladder, axonal sensitive polyneuropathy, cerebellar atrophy, ADDH                                                                                 | Yes | Yes | Yes | Yes |
| 88 | V8M   | Iqbal et al.                         | No  | NA                                                                                                                                                                                 | Yes | Yes | Yes | No  |
| 89 | I27T  | Iqbal et al.                         | No  | NA                                                                                                                                                                                 | Yes | Yes | Yes | No  |
| 90 | Y74C  | Van den Warrenburg et al.            | No  | NA                                                                                                                                                                                 | Yes | Yes | Yes | No  |
| 91 | Q632* | Van den Warrenburg et al.            | No  | NA                                                                                                                                                                                 | Yes | No  | No  | No  |
| 92 | R380W | A.E Van Beusichem et al. (patient 1) | Yes | Severe intellectual deficit, epilepsy with prominent pes planovalgus                                                                                                               | Yes | No  | Yes | NA  |
| 93 | R216C | A.E Van Beusichem et al. (patient 2) | Yes | ID, cerebellar atrophy                                                                                                                                                             | Yes | Yes | Yes | NA  |
| 94 | T99M  | VanEyck et al.                       | Yes | Partial dysgenesis of the corpus callosum, developmental delay, epilepsy, scoliosis, optical atrophy, blindness                                                                    | Yes | Yes | Yes | Yes |
| 95 | R316W | VanEyck et al.                       | Yes | CP with intermittent hypertonicity, microcephaly, developmental delay and cortical visual impairment                                                                               | Yes | Yes | Yes | Yes |
| 96 | C92*  | Wang et al.                          | Yes | Developmental delay, microcephaly, Rett syndrome features, normal brain MRI, abnormal breathing patterns                                                                           | No  | Yes | No  | Yes |
| 97 | L249P | Demily et al.                        | Yes | 22q duplication syndrome + <i>KIF1A</i> mutation. ID, cerebellar ataxia, spastic paraparesis, saccadic pursuit eye movement and horizontal nystagmus, cerebellar atrophy, seizures | Yes | Yes | Yes | Yes |
| 98 | E253K | Muir et al.                          | Yes | Infantile spasms, ID, cerebellar atrophy, optic atrophy, hypotonia                                                                                                                 | NA  | Yes | Yes | NA  |
| 99 | S217F | Kashimada et al.                     | Yes | Optic atrophy, cerebellar atrophy, ataxia                                                                                                                                          | NA  | Yes | Yes | NA  |

**Supp. Table T1 – Curation of pathogenic *KIF1A* variants previously described in the literature.** Each row represents a case



reported in the literature with a presumably pathogenic variant in *KIF1A*. In addition to variant information, additional information provided includes reference and high-level phenotypes (i.e. involvement of central nervous system).
