# Supplementary material
Source: PubMed Central journal article supplement (PMC7903881)

Figure S1

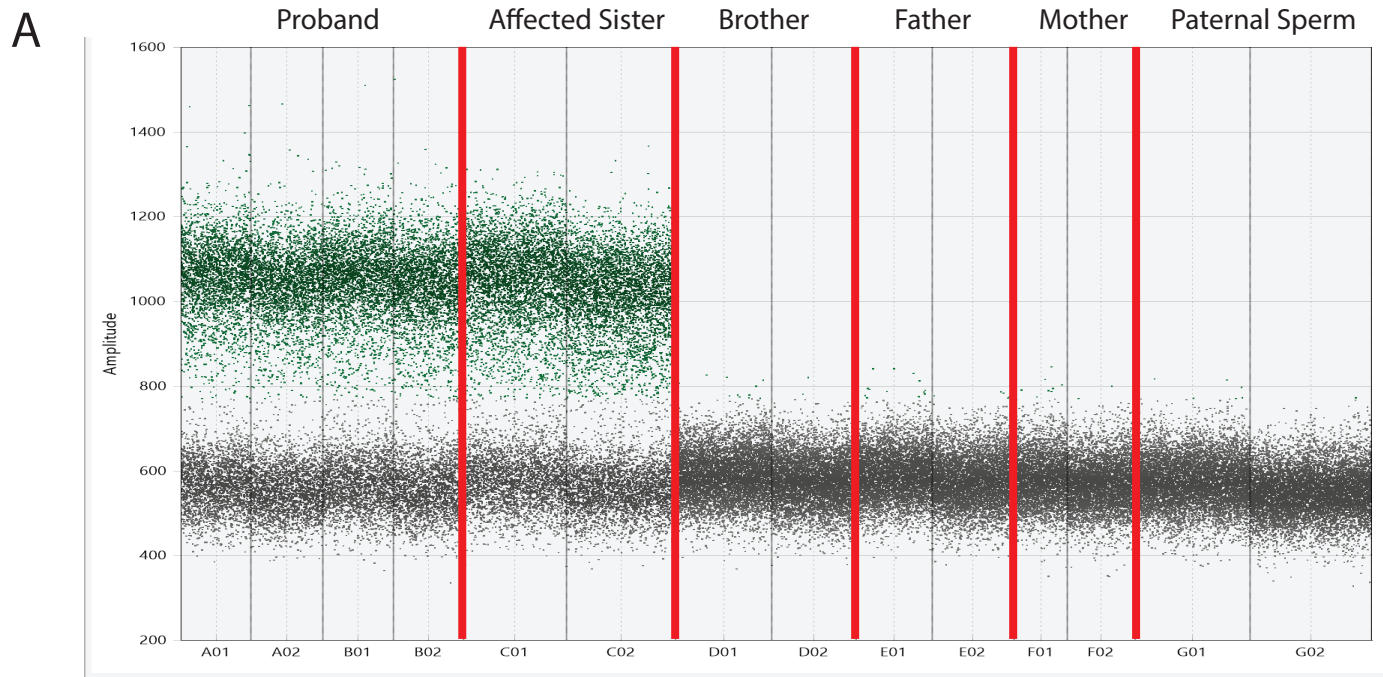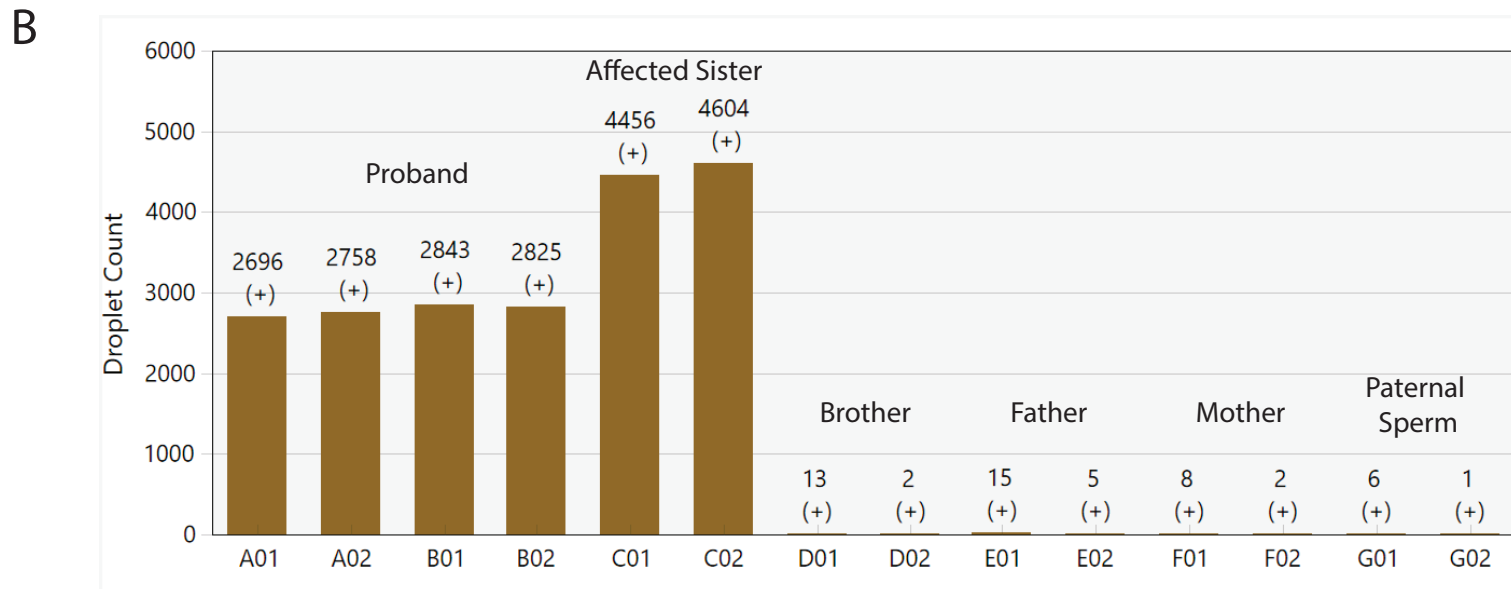

Supplement: NIHMS1669779-supplement-Supp__Figure_S1.pdf [file NIHMS1669779-supplement-Supp__Figure_S1.pdf]
